# Supplementary material for: Estrogen Regulates MAPK-Related Genes through Genomic and Nongenomic Interactions between IGF-I Receptor Tyrosine Kinase and Estrogen Receptor-Alpha Signaling Pathways in Human Uterine Leiomyoma Cells
Source: PubMed Central journal article supplement (PMC3474284; doi:10.1155/2012/204236), 2012-10-09
Supplement: 204236.f1.pdf [file 204236.f1.pdf]

**Supplemental Table. MAPK related gene expression in uterine leiomyoma (UtLM) cells with scrambled siRNA (siScr) or IGF-IR silencing (siIGF-IR) followed by E<sub>2</sub> treatment**

| Heatmap Position | Symbol | Accession Number | Description                                                                                                      | siScr                            | siIGF-IR                         |
|------------------|--------|------------------|------------------------------------------------------------------------------------------------------------------|----------------------------------|----------------------------------|
|                  |        |                  |                                                                                                                  | +E <sub>2</sub> /-E <sub>2</sub> | +E <sub>2</sub> /-E <sub>2</sub> |
| A01              | ARAF   | NM_001654        | V-raf murine sarcoma viral oncogene homolog, transduction of mitogenic signal to nucleus                         | 23.3                             | -1.2                             |
| A04              | CCNA1  | NM_003914        | Activating transcription factor 2, regulator of CDK kinases in the control of the germline meiotic cell cycle    | -3.1                             | 3.2                              |
| A06              | CCNB1  | NM_031966        | Cyclin B1, complexes with p34(cdc2) to form the maturation-promoting factor (MPF).                               | -5.0                             | 4.6                              |
| A07              | CCNB2  | NM_004701        | Cyclin B2, related to transforming growth factor beta-mediated cell cycle control                                | 94.0                             | 1.3                              |
| A08              | CCND1  | NM_053056        | Cyclin D1, cell cycle regulation, G1-S transition                                                                | 2.4                              | -3.7                             |
| A09              | CCND2  | NM_001759        | Cyclin D2, cell cycle regulation, G1-S transition                                                                | 1.4                              | 29.7                             |
| A10              | CCND3  | NM_001760        | Cyclin D3, cell cycle regulation, G1-S transition                                                                | 2.3                              | 1652.0                           |
| B01              | CDK2   | NM_001798        | Cyclin-dependent kinase 2, regulated by complex of cyclin A or E, CDK inhibitor p21Cip1 and p27Kip1              | -2.3                             | -3.3                             |
| B02              | CDK4   | NM_000075        | Cyclin-dependent kinase 4, A subunit of protein kinases complex in cell cycle G1 phase                           | 2148.2                           | 2.5                              |
| B03              | CDK6   | NM_001259        | Cyclin-dependent kinase 6, in mid-G1 phase controlled by D-type cyclins and INK4 family of CDK inhibitors        | 3.7                              | 1.5                              |
| B06              | CDKN1C | NM_000076        | Cyclin-dependent kinase inhibitor 1C (p57, Kip2)                                                                 | 37.6                             | 1.3                              |
| B07              | CDKN2A | NM_000077        | Cyclin-dependent kinase inhibitor 2A (melanoma, p16, inhibits CDK4)                                              | -3.4                             | 1.3                              |
| B08              | CDKN2B | NM_004936        | Cyclin-dependent kinase inhibitor 2B (p15, inhibits CDK4)                                                        | 198.8                            | 1.1                              |
| B10              | CDKN2D | NM_001800        | Cyclin-dependent kinase inhibitor 2D (p19, inhibits CDK4)                                                        | -2.1                             | 1.3                              |
| B11              | CHUK   | NM_001278        | Conserved helix-loop-helix ubiquitous kinase                                                                     | -3.1                             | 1.1                              |
| B12              | COL1A1 | NM_000088        | Collagen, type I, alpha 1                                                                                        | 7.3                              | -15.8                            |
| C01              | CREB1  | NM_004379        | CAMP responsive element binding protein 1, a transcription factor                                                | -3.2                             | 1.3                              |
| C02              | CREBBP | NM_004380        | CREB binding protein, a DNA binding protein of transcription factor of leucine zipper family                     | -4.1                             | -4.1                             |
| C03              | DLK1   | NM_003836        | Delta-like 1 homolog (Drosophila), contains EGF-like repeat, related to fibrosis                                 | -2.5                             | 604.7                            |
| C04              | E2F1   | NM_005225        | E2F transcription factor 1                                                                                       | 3.1                              | -1.9                             |
| C05              | EGFR   | NM_005228        | Epidermal growth factor receptor                                                                                 | 1.5                              | 67.2                             |
| C06              | EGR1   | NM_001964        | Early growth response 1, a zinc finger protein, and nuclear transcriptional regulator                            | 55.5                             | 166.6                            |
| C07              | ELK1   | NM_005229        | Transcription factor, a nuclear target of ras-raf-MAPK signaling cascade                                         | 4.4                              | 1.3                              |
| C08              | ETS1   | NM_005238        | a ETS transcription factor, involved in stem cell development, cell death, and tumorigenesis                     | -4.3                             | -1.9                             |
| C09              | ETS2   | NM_005239        | V-Ets erythroblastosis virus E26 oncogene homolog 2 (avian), a transcriptional factor                            | -1.4                             | >5000                            |
| C10              | FOS    | NM_005252        | Leucine-zip-protein, dimerizes with Jun, involved in AP-1 complex                                                | 32.8                             | 1.1                              |
| C11              | GRB2   | NM_002086        | Growth factor receptor-bound protein 2                                                                           | 12.4                             | -3.0                             |
| C12              | HRAS   | NM_005343        | V-Ha-ras Harvey rat sarcoma viral oncogene homolog, a GTPase activates proteins such as c-Raf and PI 3-kinase    | 3.6                              | -1.9                             |
| D01              | HSPA5  | NM_005347        | Heat shock 70kDa protein 5 (glucose-regulated protein, 78kDa), related to protein transport in cells             | -4.0                             | >5000                            |
| D03              | JUN    | NM_002228        | Jun oncogene, interacts with target DNA sequence to regulate gene expression                                     | 14.7                             | -1.7                             |
| D04              | KRAS   | NM_004985        | V-Ki-ras2 Kirsten rat sarcoma viral oncogene homolog, activates proteins such as c-Raf and PI 3-kinase           | 3.2                              | 1.3                              |
| D05              | KSR1   | NM_014238        | A scaffold protein connecting MEK to RAF                                                                         | 12.1                             | -1.3                             |
| D06              | MAP2K1 | NM_002755        | Mitogen-activated protein kinase kinase 1                                                                        | 470.9                            | -2.7                             |
| D08              | MAP2K2 | NM_030662        | A MAP kinase kinase, activates MAPK1/ ERK2 cascade                                                               | 84.2                             | -6.2                             |
| D09              | MAP2K3 | NM_002756        | A MAP kinase kinase, activates MAPK14/p38-MAPK .                                                                 | -4.3                             | 1.3                              |
| D10              | MAP2K4 | NM_003010        | A MAP kinase kinase, activates MAPK8/JUK cascade                                                                 | 411.0                            | 3.0                              |
| D11              | MAP2K5 | NM_002757        | A MAP kinase kinase, activates MAPK7/ERK5 cascade                                                                | 253.7                            | -1.1                             |
| E02              | MAP3K1 | NM_005921        | A MAP kinase kinase, activates ERK/JUK cascade                                                                   | 1.5                              | 53.1                             |
| E04              | MAP3K3 | NM_002401        | A MAP kinase kinase, regulates the stress-activated protein kinase (SAPK)                                        | 2.3                              | 1.8                              |
| E05              | MAP3K4 | NM_005922        | A MAP kinase kinase, activates JUK/MAPK cascade                                                                  | 475.8                            | 1951.0                           |
| E06              | MAP4K1 | NM_007181        | A MAP kinase kinase, acts upstream of JUN-N terminal pathway                                                     | 1.0                              | >5000                            |
| E07              | MAPK1  | NM_002745        | Mitogen-activated protein kinase, encoding of MAPKp42, activates Elk-1                                           | 1101.7                           | 1.3                              |
| E09              | MAPK11 | NM_002751        | A MAP kinase kinase related to p38                                                                               | 111.1                            | 2.4                              |
| E10              | MAPK12 | NM_002969        | Mitogen-activated protein kinase 12, a signal transducer during differentiation of myoblasts to myotubes         | 136.2                            | 226.0                            |
| E11              | MAPK13 | NM_002754        | A MAP kinase kinase related to p38                                                                               | 107.8                            | 3.2                              |
| F01              | MAPK3  | NM_002746        | Mitogen-activated protein kinase 3, encoding of MAPKp44, activates Elk-1                                         | 19.9                             | 1.6                              |
| F02              | MAPK6  | NM_002748        | Mitogen-activated protein kinase 6 ( p97), also known as extracellular signal-regulated kinases (ERKs)           | 1532.6                           | 3717.2                           |
| F03              | MAPK7  | NM_002749        | Mitogen-activated protein kinase 7, encoding of ERK4/5,                                                          | -495.9                           | 1.3                              |
| F06              | MAPK9  | NM_002752        | Mitogen-activated protein kinase 9, related to MAPK8, involved in UV induced apoptosis, and cell death pathway   | -2.6                             | 9.6                              |
| F07              | MAPKAP | NM_004759        | Mitogen-activated protein kinase-activated protein kinase 2                                                      | 4.8                              | -1.3                             |
| F09              | MAX    | NM_002382        | MYC associated factor X, a transcription factor                                                                  | 3.0                              | 28.1                             |
| F10              | MEF2C  | NM_002397        | Myocyte enhancer factor 2C, transcription activator binds to the MEF2 regulating cardiac muscle-specific genes   | 2.8                              | -3.7                             |
| F11              | MKNK1  | NM_003684        | MAP kinase interacting serine/threonine kinase 1, in the response to environmental stress and cytokines          | -4.3                             | 1.5                              |
| F12              | MOS    | NM_005372        | V-mos Moloney murine sarcoma viral oncogene homolog, Proto-oncogene serine/threonine-protein kinase              | -4.3                             | 7.5                              |
| G01              | MST1   | NM_020998        | Macrophage stimulating 1 (hepatocyte growth factor-like)                                                         | -2.4                             | 1.1                              |
| G02              | MYC    | NM_002467        | V-myc myelocytomatosis viral oncogene homolog (avian), a transcription factor                                    | 11.4                             | 51.3                             |
| G03              | NFATC4 | NM_004554        | Nuclear factor of activated T-cells, cytoplasmic, calcineurin-dependent 4                                        | -3.0                             | 12.4                             |
| G04              | NRAS   | NM_002524        | Neuroblastoma RAS viral (v-ras) oncogene homolog, encoded protein has intrinsic GTPase activity                  | 2.1                              | -16.4                            |
| G05              | PAK1   | NM_002576        | P21 protein (Cdc42/Rac)-activated kinase, link RhoGTPases to cytoskeleton reorganization and nuclear signaling   | -3.7                             | 6.9                              |
| G07              | RAC1   | NM_006908        | Ras-related C3 botulinum toxin substrate 1 (rho), Ras-related GTPase of RAS family of small GTP-binding proteins | 4552.5                           | 3.1                              |
| G10              | SFN    | NM_006142        | Stratifin, p53-regulated inhibitor of G2/M progression                                                           | -4.3                             | -1.9                             |
| H03              | RPL13A | NM_012423        | Ribosomal protein L13a                                                                                           | -2.2                             | 1.1                              |
